# Supplementary material
Source: PubMed Central journal article supplement (PMC4123930)
Supplement: es500997e_si_001.pdf [file es500997e_si_001.pdf]

# Supporting Information

## **Formation Mechanism of NDMA from Ranitidine, TMA and Other Tertiary Amines during Chloramination: A Computational Study**

*Yong Dong Liu<sup>a\*</sup>, Meric Selbes<sup>b</sup>, Chengchu Zeng<sup>a</sup>, Rugang Zhong<sup>a</sup>,*

*Tanju Karanfil<sup>b</sup>*

<sup>a</sup>College of Life Science & Bioengineering, Beijing University of Technology,  
Beijing 100124, China

<sup>b</sup>Department of Environmental Engineering and Earth Science, Clemson University,  
342 Computer Court, Anderson, SC 29625, USA

\*Corresponding author. phone: +86-10-6739-1667; fax: +86-10-6739-2001.

E-mail: [ydlu@bjut.edu.cn](mailto:ydlu@bjut.edu.cn).

19 pages

Supplementary Text

1 Table

3 Figures

8 Cartesian orientations of transition states

## Contents

| <b>Item</b>                          | <b>Page</b> |
|--------------------------------------|-------------|
| Text SI-1                            | 3           |
| Text SI-2                            | 5           |
| Text SI-3                            | 6           |
| Table SI-1                           | 7           |
| Figure SI-1                          | 9           |
| Figure SI-2                          | 10          |
| Figure SI-3                          | 11          |
| Standard orientation of Step 1- TS   | 12          |
| Standard orientation of Step 2- TS   | 13          |
| Standard orientation of Step 3- TS   | 14          |
| Standard orientation of Step 4- TS   | 15          |
| Standard orientation of Step 1' - TS | 16          |
| Standard orientation of Step 2' - TS | 17          |
| Standard orientation of Step 3' - TS | 18          |
| Standard orientation of Step 4' - TS | 19          |

## Text SI-1

### Experimental Details

A stock solution (4 mM) for each secondary and tertiary amine was prepared in 50 mL methanol and stored in the 65 mL amber glass bottles at 4°C until use. Each of these model compounds were diluted to 200 nM in distilled and deionized water (DDW).

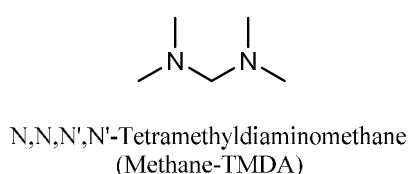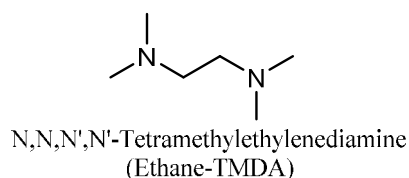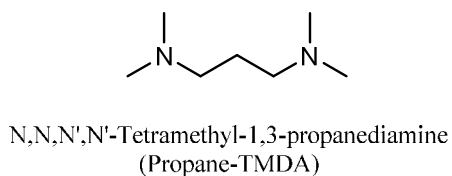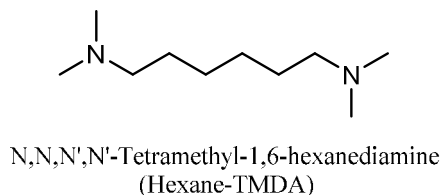

Chemical Structures of Selected Precursors

Chloramine formation potential (FP) tests were conducted by spiking a pre-calculated volume of monochloramine stock solution which was prepared by mixing diluted sodium hypochlorite and ammonium sulfate solutions at Cl:N mass ratio of 4:1 at pH 9. An initial chloramine concentration of 100 mg/L as Cl<sub>2</sub> was used at pH 7.5 in the presence of 10 mM phosphate buffer. All the nitrosamine FP tests in this study were carried out in 1-L amber glass bottles without headspace in the dark at 21-23°C and for 5 days of contact time.

NDMA was analyzed following US EPA method 521 (US EPA, 2004), consisting

a solid-phase extraction using coconut charcoal tubes followed by GC/MS analysis. Further analytical details can be found elsewhere (Selbes et al., 2013). Measured NDMA concentrations were used to calculate percent molar yield for each amine using the following equation:

$$\text{NDMA Yield (\%)} = \left( \frac{[\text{NDMA}] \text{ (nM)}}{[\text{Amine}]_0 \text{ (nM)}} \right) \times 100$$

Concentrations of free chlorine, and mono- and dichloramine as free chlorine were determined following Standard Method 4500-Cl F (APHA/AWWA/WEF, 2005). All samples and blanks were prepared, extracted and analyzed in duplicates. Error bars presented among the data show the variability due to duplicate analysis (n=2).

APHA, AWWA, WEF, 2005. Standard Methods for the Examination of Water and Wastewater, twenty-first ed.. Washington, DC.

Selbes, M., Kim, D., Ates, N., Karanfil, T., 2013. The roles of tertiary amine structure, background organic matter and chloramine species on NDMA formation, Water Res. 47 (2), 945-953.

US EPA, 2004. Method 521: Determination of Nitrosamines in Drinking Water by Solid Phase Extraction and Capillary Column Gas Chromatography with Large Volume Injection and Chemical Tandem Mass Spectrometry (MS/MS). EPA/600/R-05/054. U.S. Environmental Protection Agency. [http://www.epa.gov/microbes/m\\_521.pdf](http://www.epa.gov/microbes/m_521.pdf) (accessed on 26.03.12.).

## Text SI-2

### Calculation Details of Step 2 and Step 1'

The reaction pathways involving oxygen molecule on the singlet and triplet potential energy surfaces (PESs) have been investigated. The graphical representation of the activation free energies for these reactions is demonstrated in Figure S1. The calculation results indicate that there is an intersystem crossing between the singlet and triplet PESs for Step 2. Thus, the most feasible pathway of Step 2 proceeds through  ${}^3\text{R} \rightarrow {}^3\text{TS} \rightarrow {}^1\text{P}$ , in which the reaction starts from a singlet  $\text{RMe}_2\text{N-NX}$  and a triplet  $\text{O}_2$ , then proceeds a triplet transition state, finally forms a singlet  $\text{OONX}$  and tertiary amine from the triplet to singlet PES through the spin-orbit coupling, whereas there is no intersystem crossing for Step 1' and the most feasible pathway of Step 1 proceeds on the triplet PES through  ${}^3\text{R} \rightarrow {}^3\text{TS} \rightarrow {}^3\text{P}$ . Similar to Step 2, the intersystem crossing between the singlet PES and triplet PES occurs in Step 2'.

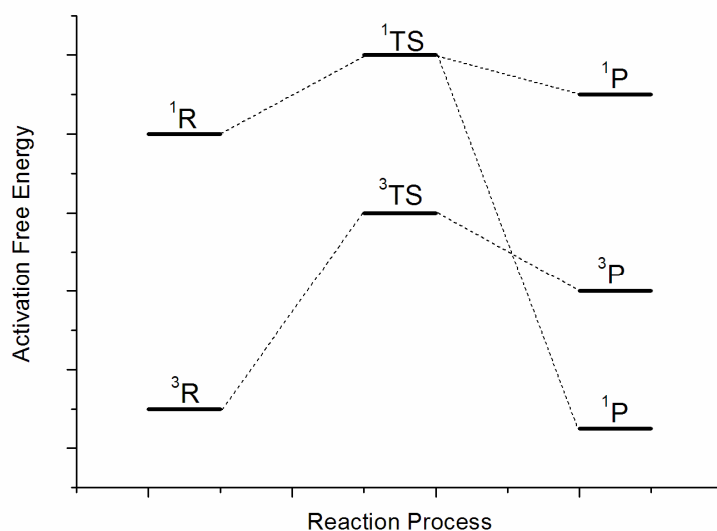

Figure S1. Graphical representation of the activation free energies for the reactions involving oxygen molecule including Step 2 and Step 1'.

## **Text SI-3**

### **Some Additional Details of Figs. 1-2**

In Figs. 1-2, the calculated activation free energies ( $\Delta G^{\ddagger c}$ ) were obtained from the calculation at the B3LYP/6-311G\* level using Gaussian program, whereas predicted activation free energies ( $\Delta G^{\ddagger p}$ ) were obtained based on the fitting formula from the single-variate linear regression analysis using the statistical software SPSS.

**Table SI-1**

Table SI-1. Activation Free Energies and Reaction Energies of Step 2 (at 298 K and 1 atm, in kcal/mol Except for  $\Delta S$  in cal/mol·K) Calculated at the B3LYP/6-311G\* Level in the Gas phase

| No. | Tertiary Amines Structure                                                                   | $\Delta G^\ddagger$ | $\Delta H$ | $\Delta G$ | $\Delta S$ |
|-----|---------------------------------------------------------------------------------------------|---------------------|------------|------------|------------|
| 1   |            | 23.4                | -11.0      | -9.1       | -6.4       |
| 2   |            | 25.5                | -7.9       | -6.2       | -5.8       |
| 3   |            | 25.4                | -9.4       | -7.4       | -6.5       |
| 4   |            | 25.5                | -9.1       | -7.1       | -6.9       |
| 5   |            | 25.6                | -8.2       | -5.9       | -7.7       |
| 6   |            | 25.0                | -8.9       | -7.0       | -6.5       |
| 7   |            | 24.2                | -9.0       | -7.1       | -6.2       |
| 8   |            | 25.8                | -7.3       | -5.4       | -6.5       |
| 9   |            | 25.5                | -7.5       | -5.9       | -5.6       |
| 10  |            | 25.2                | -7.4       | -6.1       | -4.5       |
| 11  |  C-Model  | 26.0                | -7.2       | -5.4       | -6.1       |
| 12  |          | 25.0                | -8.2       | -6.6       | -5.5       |
| 13  |          | 25.2                | -8.3       | -6.6       | -5.6       |
| 14  |  D-Model | 24.8                | -8.9       | -7.2       | -5.7       |
| 15  |          | 25.4                | -7.4       | -6.0       | -4.9       |
| 16  |          | 26.1                | -7.0       | -5.2       | -6.0       |
| 17  |          | 25.3                | -7.5       | -5.8       | -5.7       |
| 18  |          | 25.4                | -8.4       | -6.8       | -5.4       |
| 19  |          | 26.1                | -7.9       | -5.2       | -9.0       |
| 20  |          | 26.9                | -5.3       | -4.0       | -4.4       |
| 21  |          | 25.2                | -14.0      | -10.5      | -11.8      |
| 22  |          | 23.0                | -14.5      | -11.9      | -8.5       |
| 23  |          | 23.3                | -13.9      | -11.2      | -8.9       |

|    |             |      |       |       |       |
|----|-------------|------|-------|-------|-------|
| 24 |             | 23.0 | -15.9 | -13.8 | -7.2  |
| 25 |             | 23.2 | -14.4 | -12.5 | -6.4  |
| 26 |             | 27.5 | -6.5  | -4.2  | -7.6  |
| 27 |             | 23.6 | -12.7 | -11.4 | -4.4  |
| 28 |             | 27.3 | -5.5  | -3.5  | -6.9  |
| 29 |             | 27.7 | -6.5  | -3.8  | -9.2  |
| 30 |             | 26.9 | -6.2  | -4.1  | -7.0  |
| 31 |             | 24.6 | -6.3  | -6.3  | 0.2   |
| 32 |             | 26.7 | -6.3  | -5.1  | -4.2  |
| 33 |             | 23.8 | -14.0 | -11.4 | -9.0  |
| 34 |             | 24.3 | -10.7 | -8.2  | -8.5  |
| 35 |             | 24.6 | -13.5 | -10.9 | -8.7  |
| 36 |             | 23.6 | -10.6 | -8.6  | -6.4  |
| 37 |             | 27.8 | -7.0  | -4.3  | -9.3  |
| 38 |             | 26.9 | -7.1  | -4.8  | -7.6  |
| 39 |             | 26.7 | -8.2  | -6.1  | -7.1  |
| 40 |             | 26.6 | -7.3  | -5.0  | -7.6  |
| 41 |             | 26.9 | -7.6  | -6.8  | -2.7  |
| 42 |             | 26.7 | -7.3  | -4.9  | -7.8  |
| 43 |             | 26.9 | -6.9  | -4.7  | -7.5  |
| 44 | <br>R-Model | 27.2 | -6.7  | -4.4  | -7.7  |
| 45 |             | 27.2 | -7.4  | -3.5  | -13.2 |
| 46 |             | 26.5 | -7.8  | -5.6  | -7.2  |
| 47 |             | --   | --    | --    | --    |

-- means that the transition state has not been found.



**Figure SI-1**

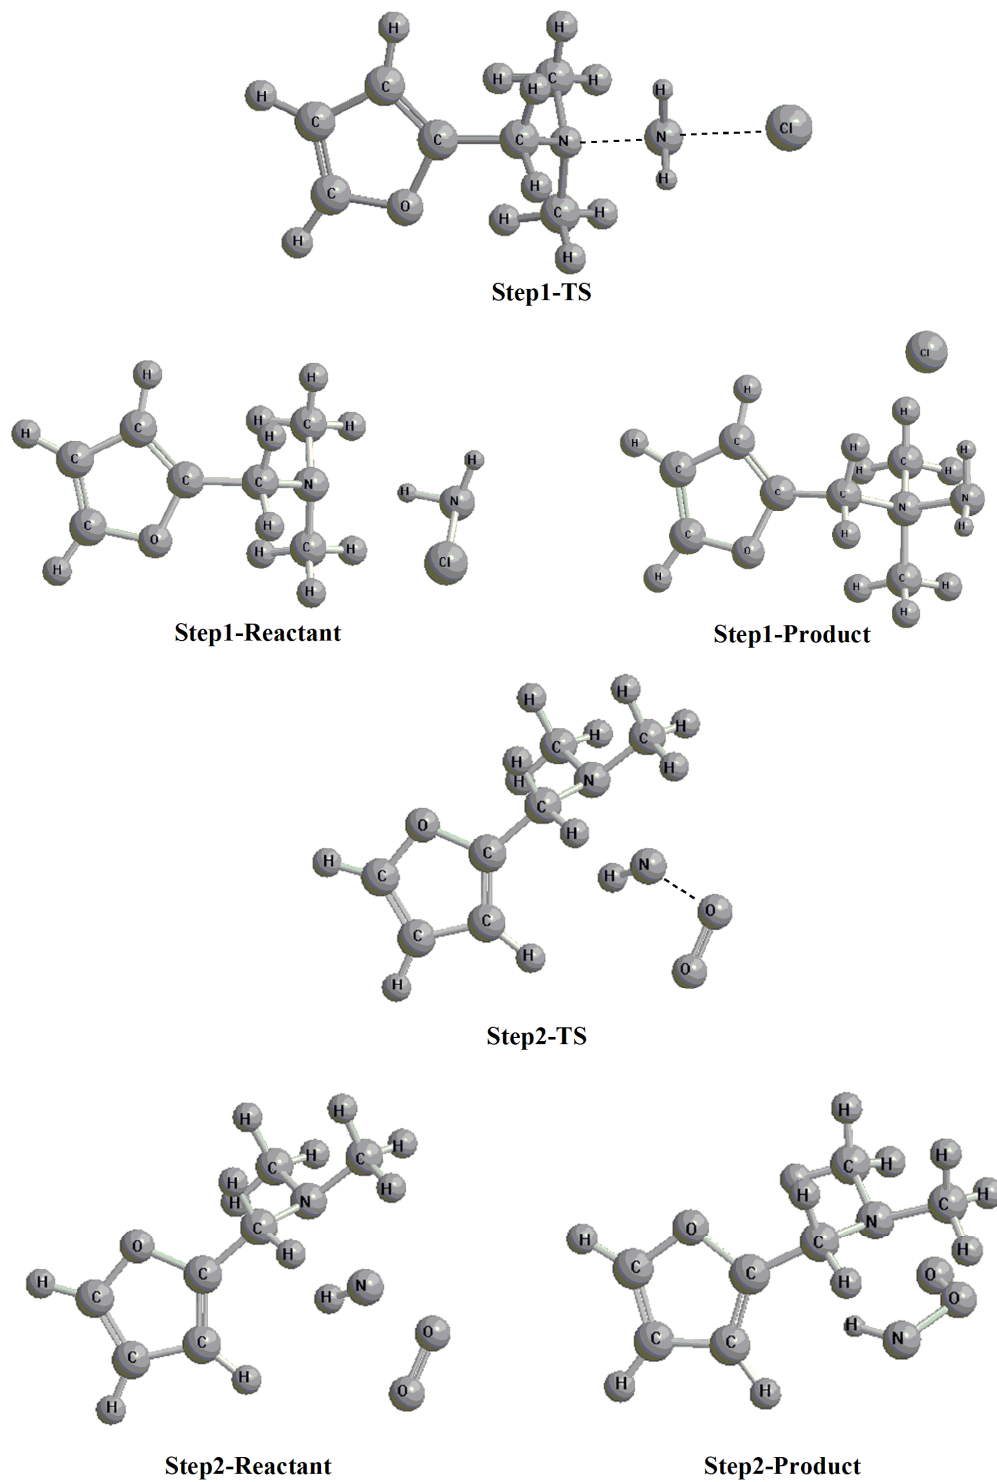

Figure SI-1. Structures of reactants, transition states and products in Steps 1 and 2 for chloramination of ranitidine

Figure SI-2

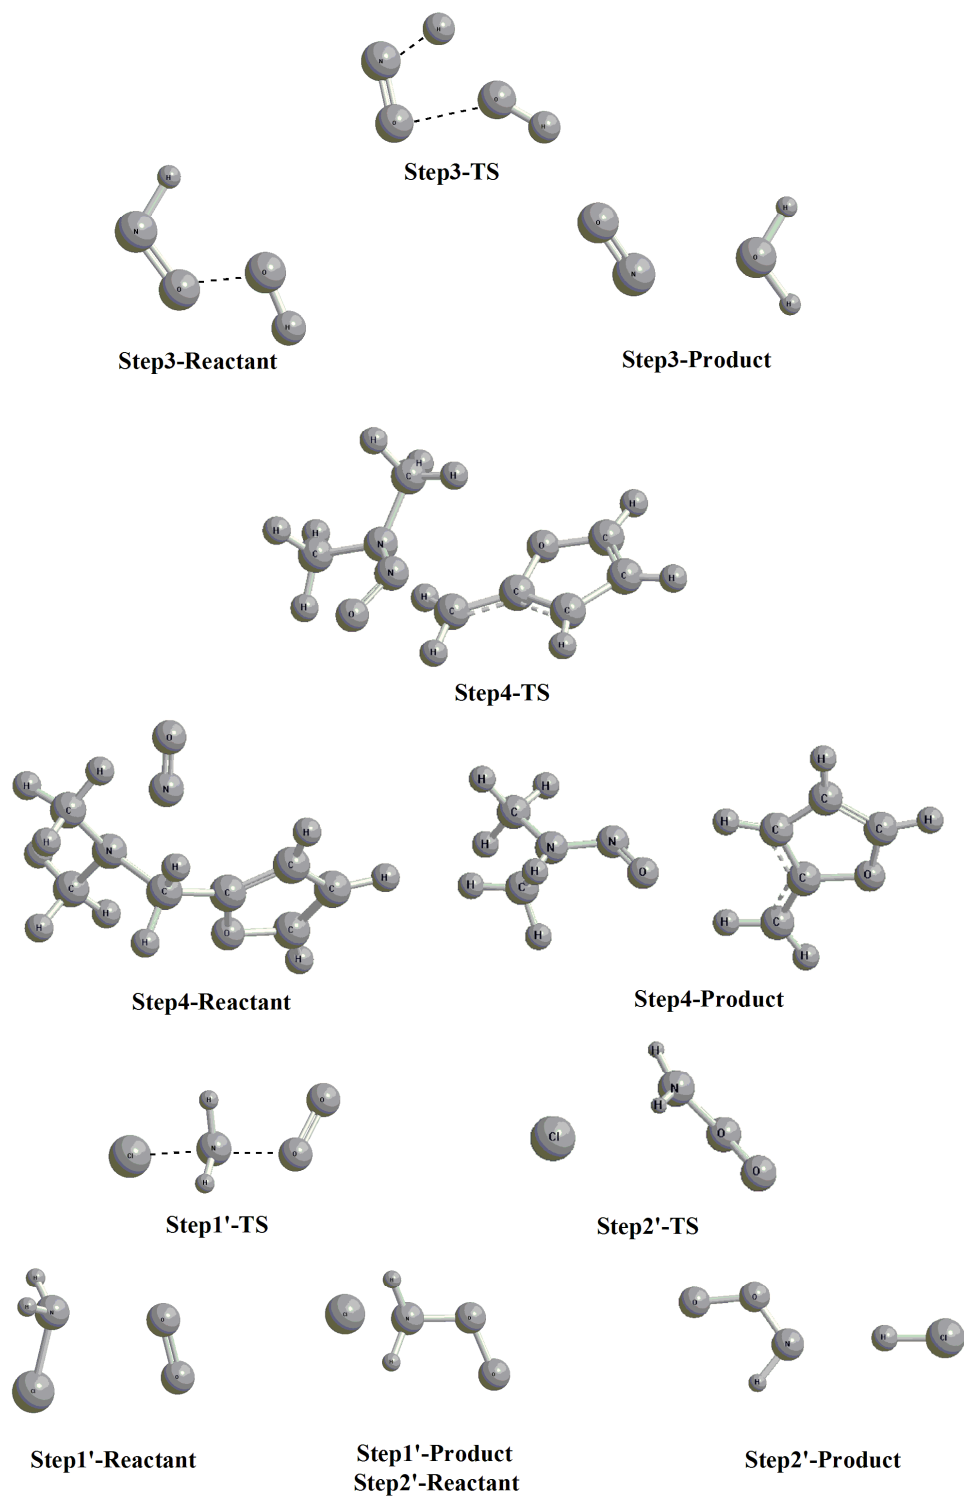

Figure SI-2. Structures of reactants, transition states and products in Steps 3 and 4 as well as Steps 1' and 2' for chloramination of ranitidine

**Figure SI-3**

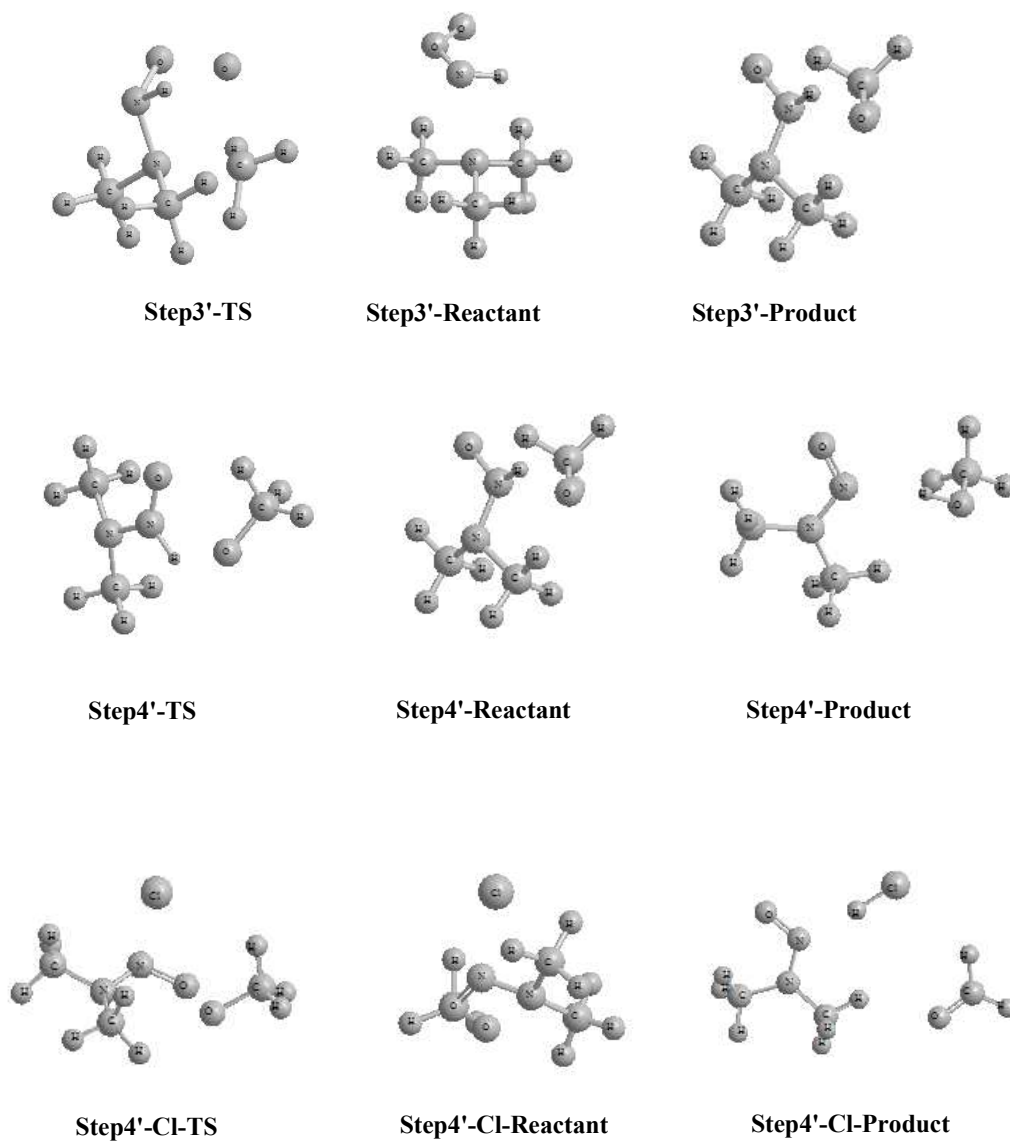

Figure SI-3. Structures of reactants, transition states and products in Steps 3' and 4' for chloramination of TMA

## Standard orientation of Step 1- TS

Cartesian coordinates of all the transition states optimized at the B3LYP/6-311G\* level:

### Standard orientation of Step1-TS

---

| Center<br>Number | Atomic<br>Number | Atomic<br>Type | Coordinates (Angstroms) |           |           |
|------------------|------------------|----------------|-------------------------|-----------|-----------|
|                  |                  |                | X                       | Y         | Z         |
| 1                | 7                | 0              | 0.487490                | 0.342712  | 0.459366  |
| 2                | 7                | 0              | 2.263622                | 0.152973  | 0.187120  |
| 3                | 6                | 0              | -0.307716               | -0.455069 | -0.529125 |
| 4                | 1                | 0              | 0.035830                | -1.487605 | -0.451446 |
| 5                | 1                | 0              | -0.032906               | -0.086759 | -1.520072 |
| 6                | 6                | 0              | 0.290967                | 1.799429  | 0.334509  |
| 7                | 1                | 0              | 1.029683                | 2.292975  | 0.962404  |
| 8                | 1                | 0              | 0.451640                | 2.096854  | -0.701703 |
| 9                | 1                | 0              | -0.719117               | 2.085140  | 0.632969  |
| 10               | 17               | 0              | 4.548437                | -0.388555 | -0.514262 |
| 11               | 1                | 0              | 2.286597                | 0.395815  | -0.802995 |
| 12               | 1                | 0              | 2.306050                | -0.865651 | 0.201511  |
| 13               | 6                | 0              | 0.318404                | -0.114648 | 1.849721  |
| 14               | 1                | 0              | 0.520203                | -1.184876 | 1.904855  |
| 15               | 1                | 0              | 1.043384                | 0.409965  | 2.468127  |
| 16               | 1                | 0              | -0.696794               | 0.078300  | 2.202930  |
| 17               | 6                | 0              | -1.784891               | -0.419527 | -0.354052 |
| 18               | 6                | 0              | -2.682319               | -1.295603 | 0.178939  |
| 19               | 8                | 0              | -2.443957               | 0.691107  | -0.814262 |
| 20               | 6                | 0              | -3.974399               | -0.694695 | 0.042379  |
| 21               | 1                | 0              | -2.455486               | -2.260981 | 0.606778  |
| 22               | 6                | 0              | -3.769112               | 0.503129  | -0.562806 |
| 23               | 1                | 0              | -4.923946               | -1.106544 | 0.347955  |
| 24               | 1                | 0              | -4.420309               | 1.302059  | -0.877553 |

---

## Standard orientation of Step 2- TS

Cartesian coordinates of all the transition states optimized at the B3LYP/6-311G\* level:

Standard orientation of Step2-TS

---

| Center<br>Number | Atomic<br>Number | Atomic<br>Type | Coordinates (Angstroms) |           |           |
|------------------|------------------|----------------|-------------------------|-----------|-----------|
|                  |                  |                | X                       | Y         | Z         |
| 1                | 6                | 0              | -0.250787               | 1.636790  | 1.410196  |
| 2                | 1                | 0              | -1.145592               | 1.697138  | 2.030331  |
| 3                | 1                | 0              | 0.313132                | 2.576246  | 1.505447  |
| 4                | 7                | 0              | -0.649681               | 1.381213  | 0.026415  |
| 5                | 6                | 0              | -1.554039               | 2.406612  | -0.490769 |
| 6                | 1                | 0              | -1.059532               | 3.386295  | -0.552899 |
| 7                | 1                | 0              | -1.901953               | 2.110520  | -1.479462 |
| 8                | 1                | 0              | -2.420851               | 2.482072  | 0.164681  |
| 9                | 6                | 0              | 0.480816                | 1.144175  | -0.900106 |
| 10               | 1                | 0              | 0.034728                | 0.893504  | -1.863209 |
| 11               | 1                | 0              | 1.061698                | 2.070343  | -1.023749 |
| 12               | 7                | 0              | -1.812665               | -0.268114 | -0.193607 |
| 13               | 8                | 0              | -3.256837               | -1.289233 | 0.186089  |
| 14               | 8                | 0              | -2.826099               | -2.469140 | 0.133541  |
| 15               | 1                | 0              | 0.373771                | 0.821965  | 1.774538  |
| 16               | 6                | 0              | 1.405072                | 0.054591  | -0.479771 |
| 17               | 6                | 0              | 1.350052                | -1.304652 | -0.546596 |
| 18               | 8                | 0              | 2.585445                | 0.440493  | 0.105768  |
| 19               | 6                | 0              | 2.565880                | -1.792741 | 0.031444  |
| 20               | 1                | 0              | 0.528361                | -1.880214 | -0.944387 |
| 21               | 6                | 0              | 3.273412                | -0.695387 | 0.405348  |
| 22               | 1                | 0              | 2.868943                | -2.822617 | 0.144682  |
| 23               | 1                | 0              | 4.236359                | -0.548493 | 0.866759  |
| 24               | 1                | 0              | -1.295151               | -0.731745 | 0.565951  |

---

### Standard orientation of Step 3- TS

Cartesian coordinates of all the transition states optimized at the B3LYP/6-311G\* level:

Standard orientation of Step3-TS

| Center<br>Number | Atomic<br>Number | Atomic<br>Type | Coordinates (Angstroms) |           |           |
|------------------|------------------|----------------|-------------------------|-----------|-----------|
|                  |                  |                | X                       | Y         | Z         |
| 1                | 7                | 0              | -0.993763               | 0.436338  | 0.000037  |
| 2                | 1                | 0              | -0.082969               | 1.162300  | 0.000135  |
| 3                | 8                | 0              | -0.552378               | -0.601053 | -0.000004 |
| 4                | 8                | 0              | 1.170542                | 0.103340  | -0.000138 |
| 5                | 1                | 0              | 2.094002                | -0.234968 | 0.000739  |

## Standard orientation of Step4-TS

Cartesian coordinates of all the transition states optimized at the B3LYP/6-311G\* level:

### Standard orientation of Step4-TS

---

| Center<br>Number | Atomic<br>Number | Atomic<br>Type | Coordinates (Angstroms) |           |           |
|------------------|------------------|----------------|-------------------------|-----------|-----------|
|                  |                  |                | X                       | Y         | Z         |
| 1                | 6                | 0              | -1.154955               | -1.257041 | -1.223603 |
| 2                | 1                | 0              | -1.962384               | -1.628729 | -1.859694 |
| 3                | 1                | 0              | -0.642136               | -2.103436 | -0.767320 |
| 4                | 7                | 0              | -1.688987               | -0.375687 | -0.179820 |
| 5                | 6                | 0              | -2.759025               | -0.906646 | 0.673683  |
| 6                | 1                | 0              | -2.462890               | -1.890447 | 1.035020  |
| 7                | 1                | 0              | -2.936403               | -0.238256 | 1.513621  |
| 8                | 1                | 0              | -3.687652               | -0.997340 | 0.103091  |
| 9                | 6                | 0              | 0.041720                | 0.083753  | 1.228179  |
| 10               | 1                | 0              | -0.463939               | 0.991912  | 1.525592  |
| 11               | 1                | 0              | -0.219422               | -0.829320 | 1.746362  |
| 12               | 7                | 0              | -1.854795               | 0.961238  | -0.679458 |
| 13               | 8                | 0              | -2.681956               | 1.591244  | -0.104552 |
| 14               | 1                | 0              | -0.458879               | -0.685262 | -1.835248 |
| 15               | 6                | 0              | 1.247641                | 0.168289  | 0.577817  |
| 16               | 6                | 0              | 1.967059                | 1.238691  | 0.020514  |
| 17               | 8                | 0              | 1.994020                | -0.992934 | 0.402254  |
| 18               | 6                | 0              | 3.160581                | 0.718603  | -0.474516 |
| 19               | 1                | 0              | 1.638989                | 2.268099  | -0.000908 |
| 20               | 6                | 0              | 3.116855                | -0.642483 | -0.211940 |
| 21               | 1                | 0              | 3.966716                | 1.248253  | -0.958290 |
| 22               | 1                | 0              | 3.818702                | -1.439805 | -0.409701 |

---

## Standard orientation of Step1'-TS

Cartesian coordinates of all the transition states optimized at the B3LYP/6-311G\* level:

Standard orientation of Step1'-TS

---

| Center<br>Number | Atomic<br>Number | Atomic<br>Type | Coordinates (Angstroms) |           |           |
|------------------|------------------|----------------|-------------------------|-----------|-----------|
|                  |                  |                | X                       | Y         | Z         |
| 1                | 7                | 0              | 0.197310                | -0.004980 | 0.266878  |
| 2                | 1                | 0              | 0.349753                | 1.003334  | 0.203367  |
| 3                | 8                | 0              | 1.664953                | -0.543649 | -0.119955 |
| 4                | 8                | 0              | 2.505321                | 0.395845  | -0.107302 |
| 5                | 1                | 0              | 0.149678                | -0.266804 | 1.252128  |
| 6                | 17               | 0              | -2.073105               | 0.028280  | -0.088563 |

---



## Standard orientation of Step2'-TS

Cartesian coordinates of all the transition states optimized at the B3LYP/6-311G\* level:

Standard orientation of Step2'-TS

---

| Center<br>Number | Atomic<br>Number | Atomic<br>Type | Coordinates (Angstroms) |           |           |
|------------------|------------------|----------------|-------------------------|-----------|-----------|
|                  |                  |                | X                       | Y         | Z         |
| 1                | 7                | 0              | 0.493966                | 0.786050  | 0.282599  |
| 2                | 1                | 0              | -0.236956               | 1.257557  | -0.264590 |
| 3                | 8                | 0              | 1.453211                | 0.264028  | -0.419088 |
| 4                | 8                | 0              | 2.076054                | -0.719247 | 0.140449  |
| 5                | 1                | 0              | 0.270982                | 0.298000  | 1.151850  |
| 6                | 17               | 0              | -1.866230               | -0.200950 | -0.037432 |

---

## Standard orientation of Step3'-TS

Cartesian coordinates of all the transition states optimized at the B3LYP/6-311G\* level:

Standard orientation of Step3'-TS

---

| Center<br>Number | Atomic<br>Number | Atomic<br>Type | Coordinates (Angstroms) |           |           |
|------------------|------------------|----------------|-------------------------|-----------|-----------|
|                  |                  |                | X                       | Y         | Z         |
| 1                | 6                | 0              | 0.345323                | 1.655929  | 0.367263  |
| 2                | 1                | 0              | 0.906636                | 1.593766  | 1.286892  |
| 3                | 1                | 0              | -0.672296               | 2.026734  | 0.527764  |
| 4                | 7                | 0              | -0.649237               | -0.080164 | -0.025617 |
| 5                | 6                | 0              | -1.288793               | -0.476006 | 1.235101  |
| 6                | 1                | 0              | -1.774908               | 0.392975  | 1.681767  |
| 7                | 1                | 0              | -2.028212               | -1.263464 | 1.061385  |
| 8                | 1                | 0              | -0.514106               | -0.843036 | 1.903678  |
| 9                | 6                | 0              | -1.610070               | 0.267560  | -1.072963 |
| 10               | 1                | 0              | -2.224889               | -0.597717 | -1.341577 |
| 11               | 1                | 0              | -2.260897               | 1.065169  | -0.711886 |
| 12               | 1                | 0              | -1.073344               | 0.624950  | -1.952330 |
| 13               | 7                | 0              | 0.216558                | -1.135507 | -0.459309 |
| 14               | 1                | 0              | 0.434290                | -0.904562 | -1.433468 |
| 15               | 8                | 0              | 1.451707                | -0.914650 | 0.193387  |
| 16               | 8                | 0              | 1.887699                | 0.354155  | -0.242003 |
| 17               | 1                | 0              | 0.842467                | 2.213948  | -0.415226 |

---

## Standard orientation of Step4'-TS

Cartesian coordinates of all the transition states optimized at the B3LYP/6-311G\* level:

Standard orientation of Step4'-TS

---

| Center<br>Number | Atomic<br>Number | Atomic<br>Type | Coordinates (Angstroms) |           |           |
|------------------|------------------|----------------|-------------------------|-----------|-----------|
|                  |                  |                | X                       | Y         | Z         |
| 1                | 6                | 0              | 2.371880                | 0.140754  | 0.561336  |
| 2                | 1                | 0              | 3.350619                | 0.224021  | 0.055979  |
| 3                | 1                | 0              | 2.093591                | -0.939843 | 0.499493  |
| 4                | 7                | 0              | -1.230369               | 0.003646  | -0.225227 |
| 5                | 6                | 0              | -1.646336               | -0.723886 | 0.969070  |
| 6                | 1                | 0              | -2.673532               | -0.438833 | 1.190841  |
| 7                | 1                | 0              | -1.598738               | -1.792681 | 0.778677  |
| 8                | 1                | 0              | -1.000983               | -0.477454 | 1.820720  |
| 9                | 6                | 0              | -1.389348               | 1.455372  | -0.212372 |
| 10               | 1                | 0              | -2.442083               | 1.677068  | -0.039965 |
| 11               | 1                | 0              | -0.754024               | 1.905550  | 0.552076  |
| 12               | 1                | 0              | -1.107423               | 1.862258  | -1.184265 |
| 13               | 7                | 0              | -0.052001               | -0.413719 | -0.757167 |
| 14               | 1                | 0              | 0.483399                | 0.275727  | -1.311926 |
| 15               | 8                | 0              | 0.352613                | -1.560648 | -0.618276 |
| 16               | 8                | 0              | 1.408704                | 0.933481  | -0.010218 |
| 17               | 1                | 0              | 2.518054                | 0.358589  | 1.634879  |

---
